# Supplementary material
Source: publisher figshare collection journal article supplement (https://sage.figshare.com/ndownloader/files/26578246)
Supplement: Supplementary file 1 [file 26578246]

## Online Appendix

**Table 1.** Modified Upper Extremity Motor Testing Scale for Telemedicine

| Muscle Group     | Nerve Root | Strength | Description                                                                                                                              |
|------------------|------------|----------|------------------------------------------------------------------------------------------------------------------------------------------|
| Deltoid          | C5         | 0        | Absence of any muscle activation                                                                                                         |
|                  |            | 1        | Muscle flicker                                                                                                                           |
|                  |            | 2        | Able to abduct shoulder without gravity (supine)                                                                                         |
|                  |            | 3        | Able to abduct shoulder against gravity                                                                                                  |
|                  |            | 4        | Able to abduct shoulder with 5-10lb of resistance (dumbbell, etc.)                                                                       |
|                  |            | 5        | <i>Difficult to assess; can consider full strength if able to abduct shoulder with weight &gt;10 lbs</i>                                 |
| Bicep            | C5, C6     | 0        | Absence of any muscle activation                                                                                                         |
|                  |            | 1        | Muscle flicker                                                                                                                           |
|                  |            | 2        | Able to flex elbow without gravity (supine)                                                                                              |
|                  |            | 3        | Able to flex elbow against gravity                                                                                                       |
|                  |            | 4        | Able to flex elbow with 5-10lb of resistance (dumbbell, etc.)                                                                            |
|                  |            | 5        | <i>Difficult to assess; can consider full strength if able to flex elbow with weight &gt;10 lbs</i>                                      |
| Triceps          | C6, C7     | 0        | Absence of any muscle activation                                                                                                         |
|                  |            | 1        | Muscle flicker                                                                                                                           |
|                  |            | 2        | Able to extend elbow without gravity (supine)                                                                                            |
|                  |            | 3        | Able to extend elbow against gravity                                                                                                     |
|                  |            | 4        | Able to extend elbow with 5-10lb of resistance (dumbbell, etc.)                                                                          |
|                  |            | 5        | <i>Difficult to assess; can consider full strength if able to extend elbow with weight &gt;10 lbs</i>                                    |
| Wrist Extensors  | C6         | 0        | Absence of any muscle activation                                                                                                         |
|                  |            | 1        | Muscle flicker                                                                                                                           |
|                  |            | 2        | Able to extend wrist without gravity (supine)                                                                                            |
|                  |            | 3        | Able to extend wrist against gravity                                                                                                     |
|                  |            | 4        | Able to extend wrist with 2-5lb of resistance (dumbbell, etc.)                                                                           |
|                  |            | 5        | <i>Difficult to assess; can consider full strength if able to extend wrist with weight &gt;5lbs</i>                                      |
| Finger flexors   | C8         | 0        | Absence of any muscle activation                                                                                                         |
|                  |            | 1        | Muscle flicker                                                                                                                           |
|                  |            | 2        | Able to make a full fist in supination                                                                                                   |
|                  |            | 3        | Able to make a full fist in pronation                                                                                                    |
|                  |            | 4        | Able to make a full fist in pronation with some resistance from contralateral hand                                                       |
|                  |            | 5        | <i>Difficult to assess; can consider full strength if make a full fist with near full resistance from contralateral hand</i>             |
| Finger abduction | C8, T1     | 0        | Absence of any muscle activation                                                                                                         |
|                  |            | 1        | Muscle flicker                                                                                                                           |
|                  |            | 2        | Able to abduct fingers with palm resting on a flat surface                                                                               |
|                  |            | 3        | Able to abduct fingers with palm perpendicular to flat surface                                                                           |
|                  |            | 4        | Able to abduct fingers fully with some resistance from contralateral hand                                                                |
|                  |            | 5        | <i>Difficult to assess; can consider full strength if able to abduct fingers fully with near full resistance from contralateral hand</i> |

Source: Iyer S, Shafi K, Lovecchio F, Turner R, Albert TJ, Kim HJ, Press J, Katsuura Y, Sandhu H, Schwab F, Qureshi S. The Spine Physical Examination Using Telemedicine: Strategies and Best Practices. *Global Spine J.* 2020 Aug 5:2192568220944129. doi: 10.1177/2192568220944129. Epub ahead of print. PMID: 32755256.

**Table 2.** Modified Lower Extremity Motor Testing Scale for Telemedicine

| Muscle Group                                                                                               | Nerve Root | Strength | Description                                                                                                                                       |
|------------------------------------------------------------------------------------------------------------|------------|----------|---------------------------------------------------------------------------------------------------------------------------------------------------|
| Iliopsoas*                                                                                                 | L1, L2, L3 | 0        | Absence of any muscle activation                                                                                                                  |
| *May be performed in seated position if patient unable to balance                                          |            | 1        | Muscle flicker                                                                                                                                    |
|                                                                                                            |            | 2        | Able to flex hip without gravity (lateral decubitus position)                                                                                     |
|                                                                                                            |            | 3        | Able to flex hip against gravity (allow knee to passively flex, chair for balance)                                                                |
|                                                                                                            |            | 4        | Able to flex hip against gravity, and maintain (allow knee to passively flex, chair for balance)                                                  |
|                                                                                                            |            | 5        | <i>Difficult to assess; can consider full strength if flex hip against gravity and maintain without difficulty</i>                                |
| Quadriceps*                                                                                                | L2, L3, L4 | 0        | Absence of any muscle activation                                                                                                                  |
| *If unable to perform single leg raise, may perform knee extension and attempt to maintain against gravity |            | 1        | Muscle flicker                                                                                                                                    |
|                                                                                                            |            | 2        | Able to extend knee without gravity (lateral decubitus position)                                                                                  |
|                                                                                                            |            | 3        | Able to perform a single leg raise from chair with support                                                                                        |
|                                                                                                            |            | 4        | Able to perform a single leg raise from chair without support, moderate difficulty                                                                |
|                                                                                                            |            | 5        | <i>Difficult to assess; can consider full strength if able to perform a single leg raise from a chair without support or perceived difficulty</i> |
| Tibialis Anterior                                                                                          | L4         | 0        | Absence of any muscle activation                                                                                                                  |
|                                                                                                            |            | 1        | Muscle flicker                                                                                                                                    |
|                                                                                                            |            | 2        | Able to dorsiflex ankle without gravity (lateral decubitus position)                                                                              |
|                                                                                                            |            | 3        | Able to raise onto heels, unable to maintain                                                                                                      |
|                                                                                                            |            | 4        | Able to raise onto heels and maintain this position for 10 seconds                                                                                |
|                                                                                                            |            | 5        | <i>Difficult to assess; can consider full strength if able to raise onto heels and perform lateral walks for 10 paces</i>                         |
| Gastrocnemius-soleus complex                                                                               | S1         | 0        | Absence of any muscle activation                                                                                                                  |
|                                                                                                            |            | 1        | Muscle flicker                                                                                                                                    |
|                                                                                                            |            | 2        | Able to plantarflex ankle without gravity (lateral decubitus position)                                                                            |
|                                                                                                            |            | 3        | Able to raise onto toes, unable to maintain                                                                                                       |
|                                                                                                            |            | 4        | Able to raise onto toes (raise heels) and perform 10 heel raises, with some difficulty                                                            |

|  |  |   |                                                                                                                                      |
|--|--|---|--------------------------------------------------------------------------------------------------------------------------------------|
|  |  | 5 | <i>Difficult to assess; can consider full strength if able to perform 10 repetitions of heel raises without perceived difficulty</i> |
|--|--|---|--------------------------------------------------------------------------------------------------------------------------------------|

*Source:* Iyer S, Shafi K, Lovecchio F, Turner R, Albert TJ, Kim HJ, Press J, Katsuura Y, Sandhu H, Schwab F, Qureshi S. The Spine Physical Examination Using Telemedicine: Strategies and Best Practices. *Global Spine J.* 2020 Aug 5:2192568220944129. doi: 10.1177/2192568220944129. Epub ahead of print. PMID: 32755256.

**Table 3.** Special Tests for Spine pathology compatible with telehealth.

| Test                                    | Description                                                                                                                                                                                  | Positive Result                                                                                                                                                   |
|-----------------------------------------|----------------------------------------------------------------------------------------------------------------------------------------------------------------------------------------------|-------------------------------------------------------------------------------------------------------------------------------------------------------------------|
| Finger escape Sign                      | Fingers held in adducted and extended position for 30 seconds                                                                                                                                | Ulnar drift and flexion of ring and small fingers                                                                                                                 |
| Grasp and Release Test                  | Beginning with an open palm, the patient is instructed to grip and release their fingers as many times as possible within a period of 10 seconds.                                            | Inability to complete 20 repetitions within 10 seconds suggestive of underlying myelopathy                                                                        |
| 10s-Step Test                           | In standing position, patient "marches" in place, taking alternating high steps raising hips to 90 degrees of flexion. Number of alternating steps in 10 seconds recorded                    | Inability to take 20 total steps within 10 seconds suggestive of underlying myelopathy                                                                            |
| Single Leg Stance (SLS) Test            | Beginning in the standing position, the patient is first asked to flex one leg to 90 degrees, allowing knee to passively flex and maintain this position                                     | Inability to maintain stance for 30 seconds indicative of L5 pathology (may overlap with hip pathology)                                                           |
| 5-Repetition Sit-to-Stand (5R STS) Test | From seated position, the patient is asked to stand fully upon hearing the starting cue ("Go") and subsequently sit again, touching the seat firmly. This maneuver is repeated for 5 cycles. | Total time >15 seconds associated with worse overall lower extremity function and disability                                                                      |
| Straight Leg Raise (SLR)                | From the supine position, patient asked to actively flex their hip, keeping knee extended                                                                                                    | Pain with hip flexion beyond 30 degrees suggestive of herniated nucleus pulposus (HNP). Inability to perform straight leg raise suggestive of iliopsoas weakness. |

*Source:* Iyer S, Shafi K, Lovecchio F, Turner R, Albert TJ, Kim HJ, Press J, Katsuura Y, Sandhu H, Schwab F, Qureshi S. The Spine Physical Examination Using Telemedicine: Strategies and Best Practices. *Global Spine J.* 2020 Aug 5:2192568220944129. doi: 10.1177/2192568220944129. Epub ahead of print. PMID: 32755256.
